# Supplementary material
Source: PubMed Central journal article supplement (PMC2952445)

### Evidence for the placement of cannula in PAG

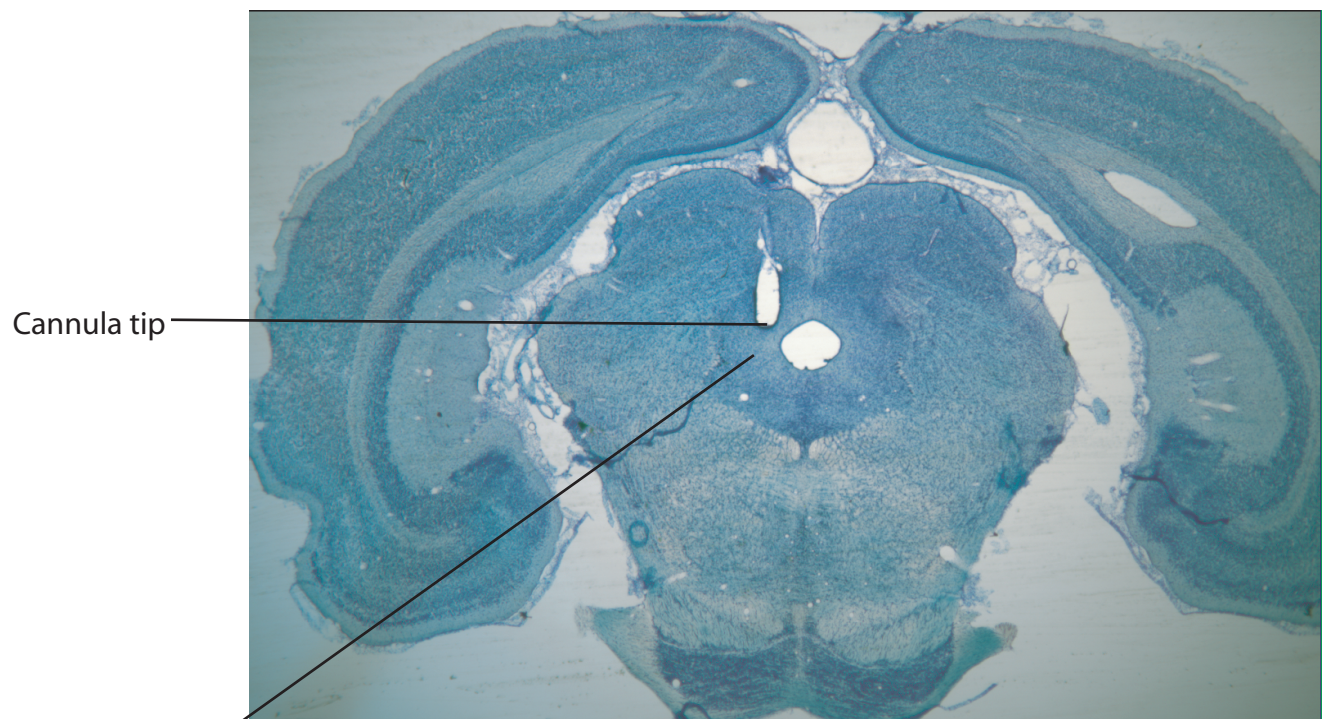

PAG

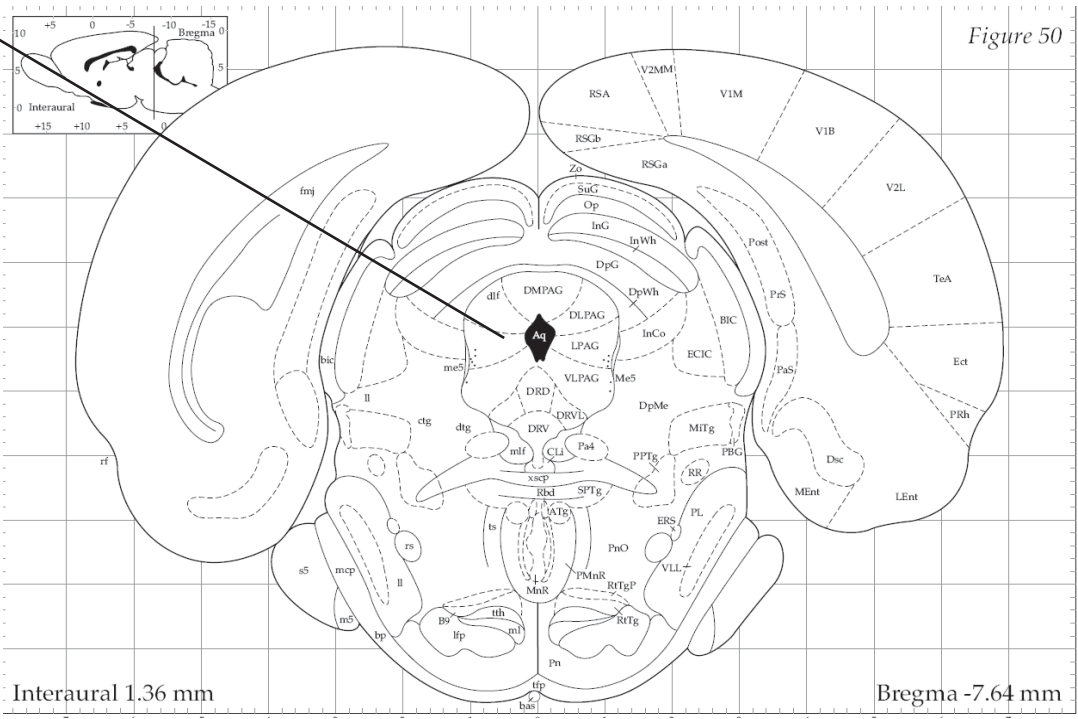

Supplement: NIHMS114706-supplement-01.pdf [file NIHMS114706-supplement-01.pdf]
